# Supplementary material for: Synthesis, structural studies and computational evaluation of cyclophanes incorporating imidazole-2-selones
Source: Royal Society of Chemistry journal article supplement (doi:10.1039/d3ra02913a), 2023-01-01
Supplement: d3ra02913a1.pdf [file d3ra02913a1.pdf]

## Supplementary Material

# Synthesis, Structural Studies and Computational Evaluation of Cyclophanes Incorporating Imidazole-2-Selones

Ahmed Hassoon Mageed<sup>a\*</sup> and Karrar Al-Ameed<sup>a</sup>

*a* Department of Chemistry, Faculty of Science, The University of Kufa, P.O. Box 21, Najaf 54001, Iraq.

\*Email: [ahmedh.alameri@uokufa.edu.iq](mailto:ahmedh.alameri@uokufa.edu.iq)

### Table of Contents

|                                                                                                                                     | page   |
|-------------------------------------------------------------------------------------------------------------------------------------|--------|
| <sup>1</sup> H and <sup>13</sup> C NMR spectra of selone compounds                                                                  | S2-S10 |
| Table S1: The Cartesian coordinates in (Angstroms) of <b>8</b> geometry                                                             | S11    |
| Table S2: The Cartesian coordinates in (Angstroms) of <b>9</b> geometry                                                             | S12    |
| Table S3: The Cartesian coordinates in (Angstroms) of <b>10</b> geometry                                                            | S13    |
| Table S4: The cartesian coordinates in (Angstroms) optimized<br>geometry of <b>11</b> using BP86/def2-TZVP of <b>syn</b> conformers | S14    |
| Table S5: The optimized geometry of <b>11</b> using BP86/def2-TZVP of <b>anti</b> conformers                                        | S15    |
| The optimized geometry of <b>11</b>                                                                                                 | S16    |

# $^1\text{H}$ and $^{13}\text{C}$ NMR spectra of selone compounds

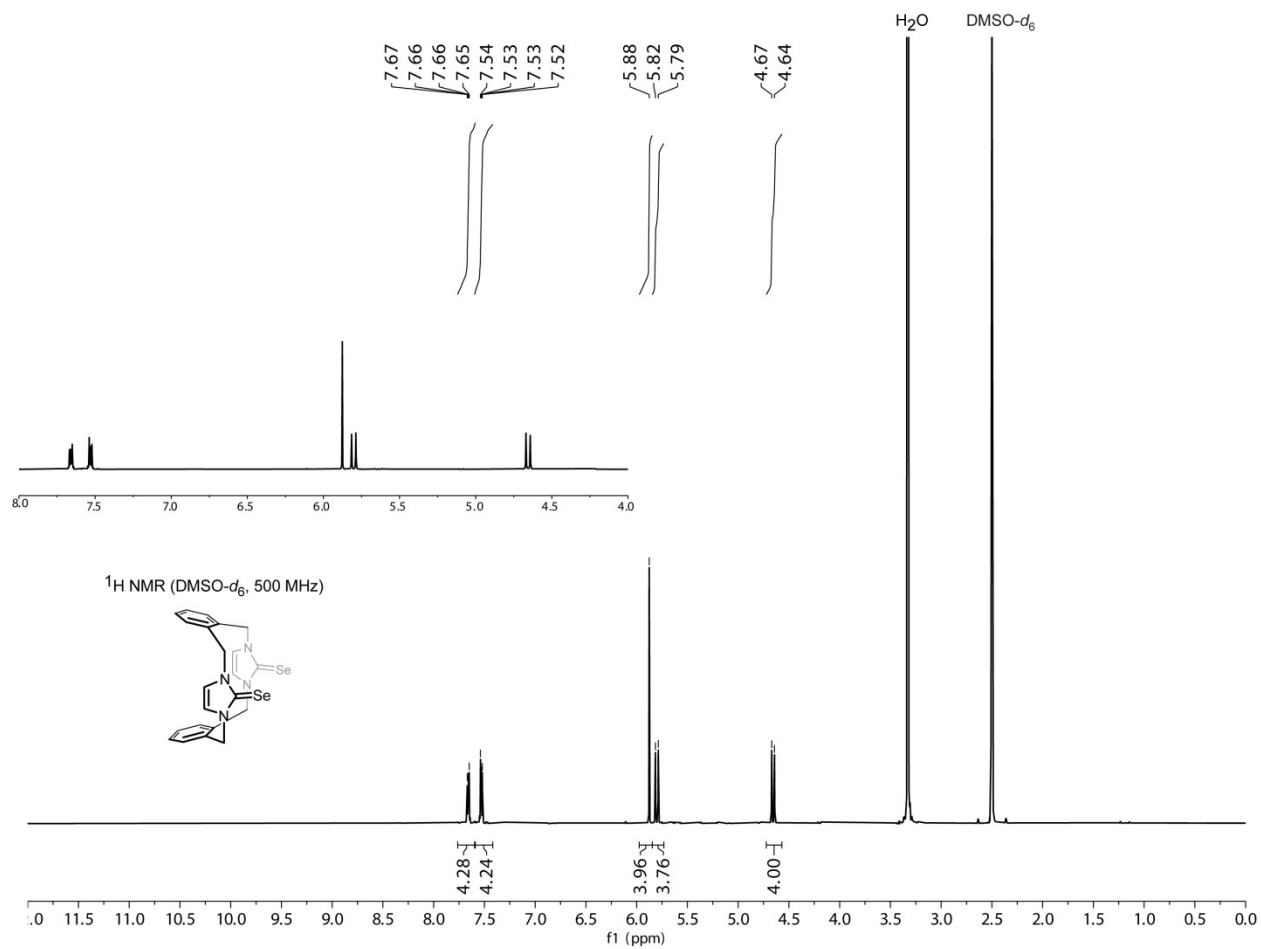

**Figure S1.**  $^1\text{H}$  NMR of **8** in DMSO- $d_6$  at 500.10 MHz.

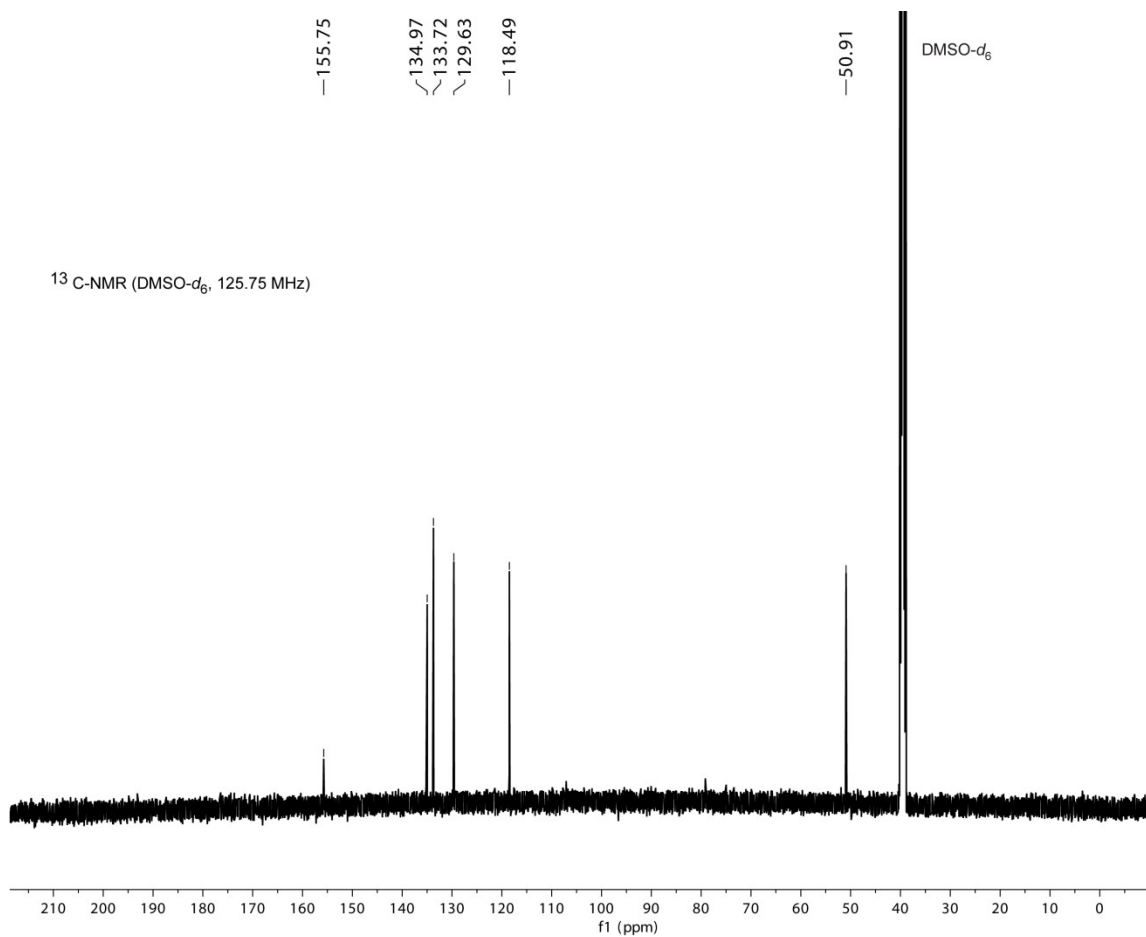

**Figure S2.** <sup>13</sup>C NMR of **8** in DMSO-*d*<sub>6</sub> at 125.75 MHz.

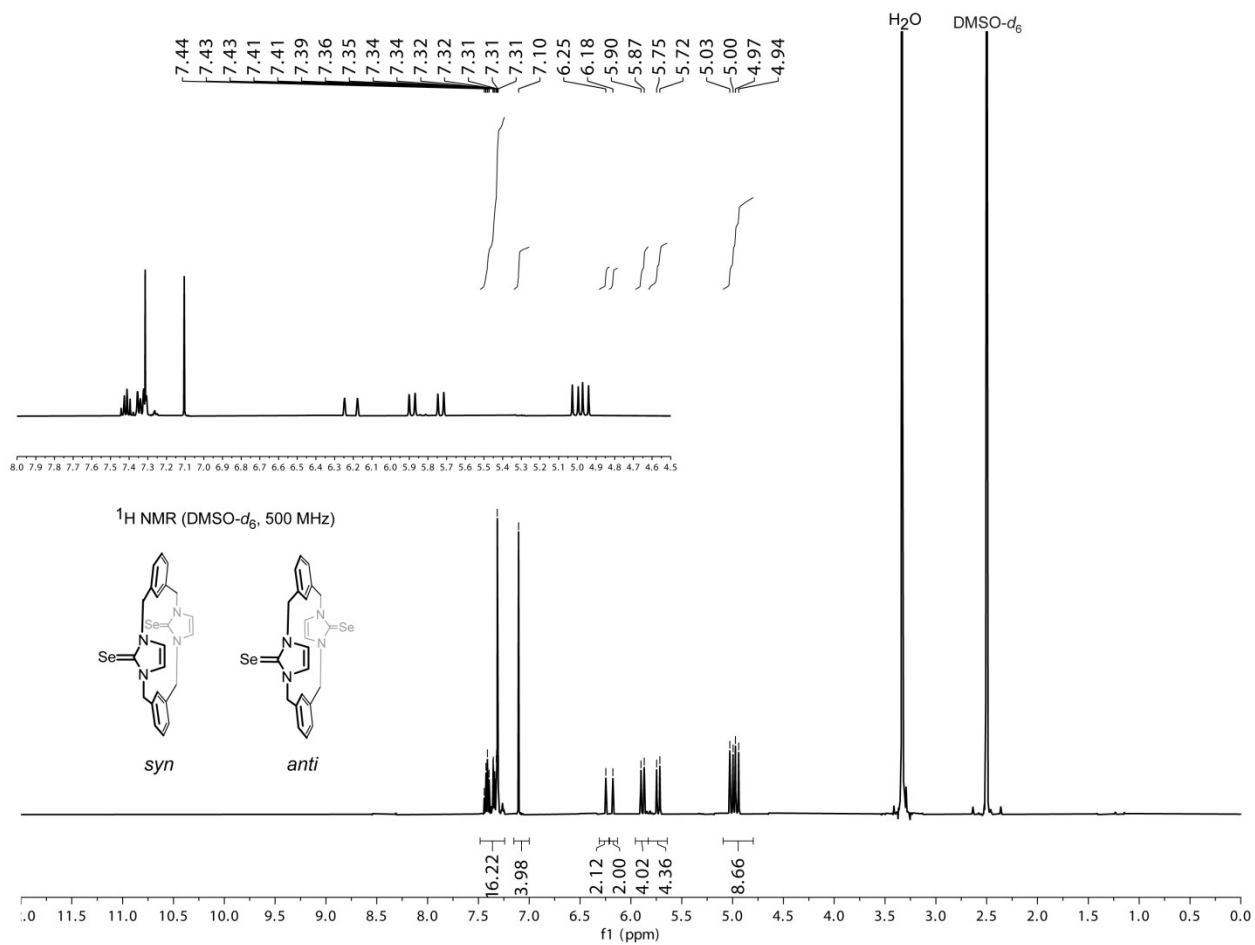

**Figure S3.** <sup>1</sup>H NMR of **9** in DMSO-*d*<sub>6</sub> at 500.10 MHz.

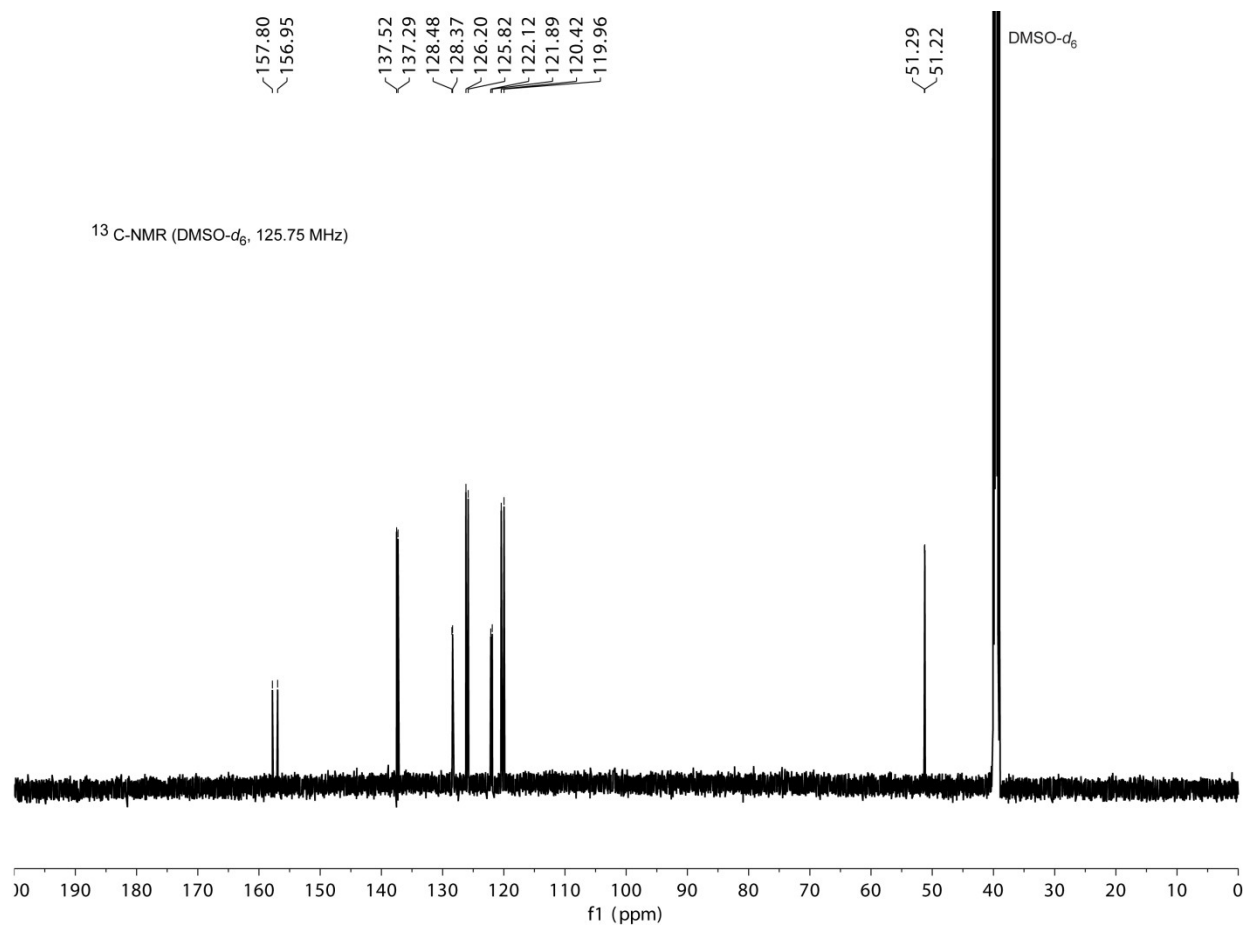

**Figure S4.** <sup>13</sup>C NMR of **9** in DMSO-*d*<sub>6</sub> at 125.75 MHz.

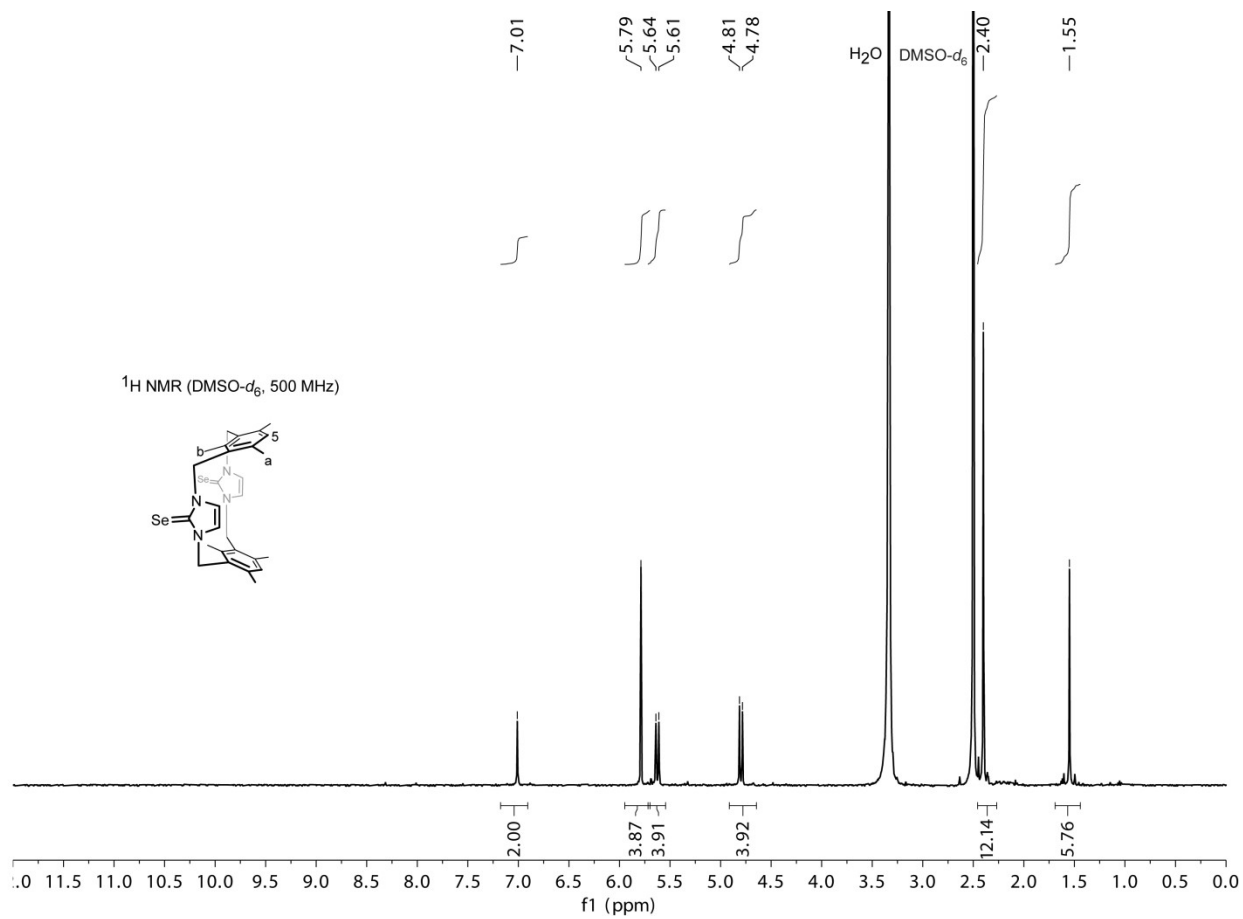

**Figure S5.** <sup>1</sup>H NMR of **10** in DMSO-*d*<sub>6</sub> at 500.10 MHz.

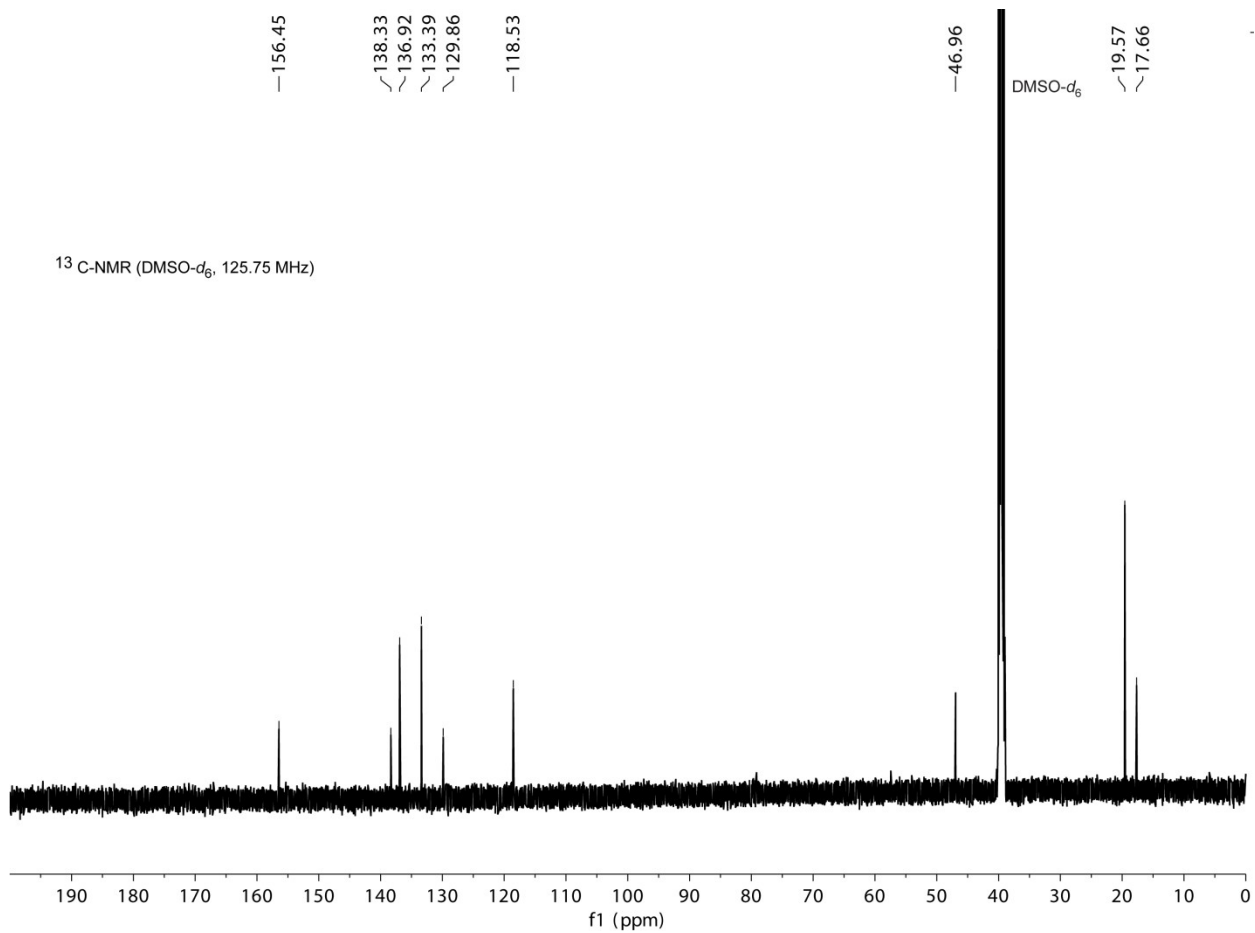

**Figure S6.** <sup>13</sup>C NMR of **10** in DMSO-*d*<sub>6</sub> at 125.75 MHz.

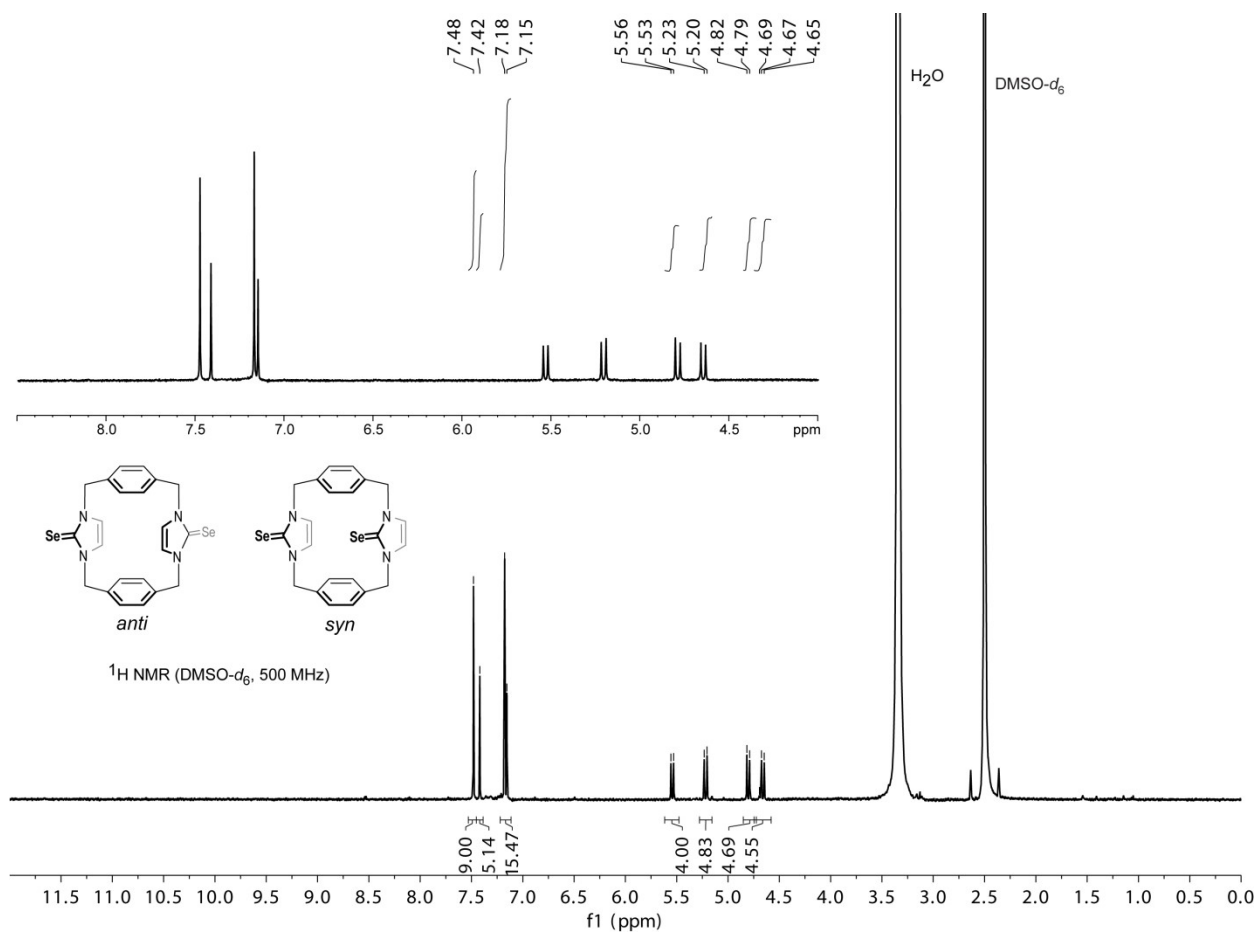

Figure S7. <sup>1</sup>H NMR of **11** in DMSO-*d*<sub>6</sub> at 500.10 MHz.



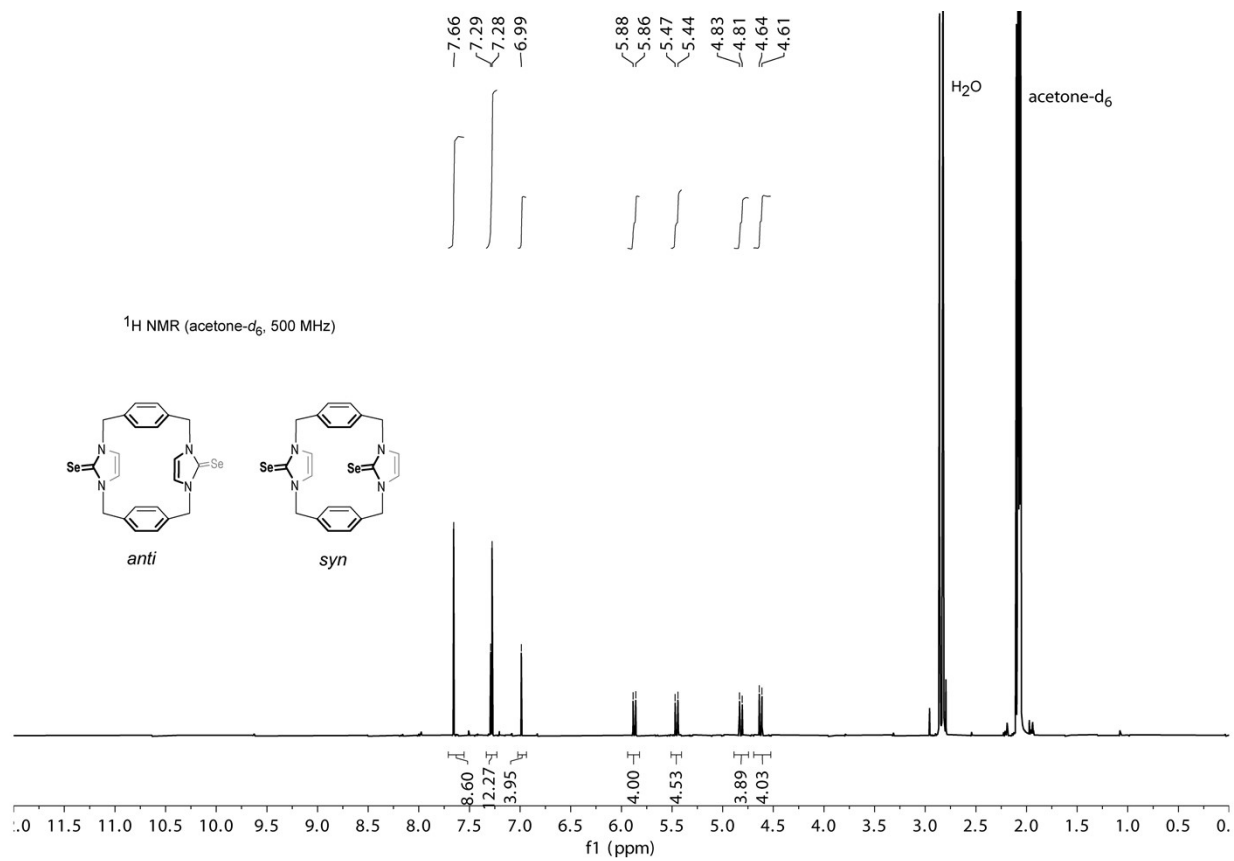

**Figure S8.** <sup>1</sup>H NMR of **11** in acetone-d<sub>6</sub> at 500.10 MHz.

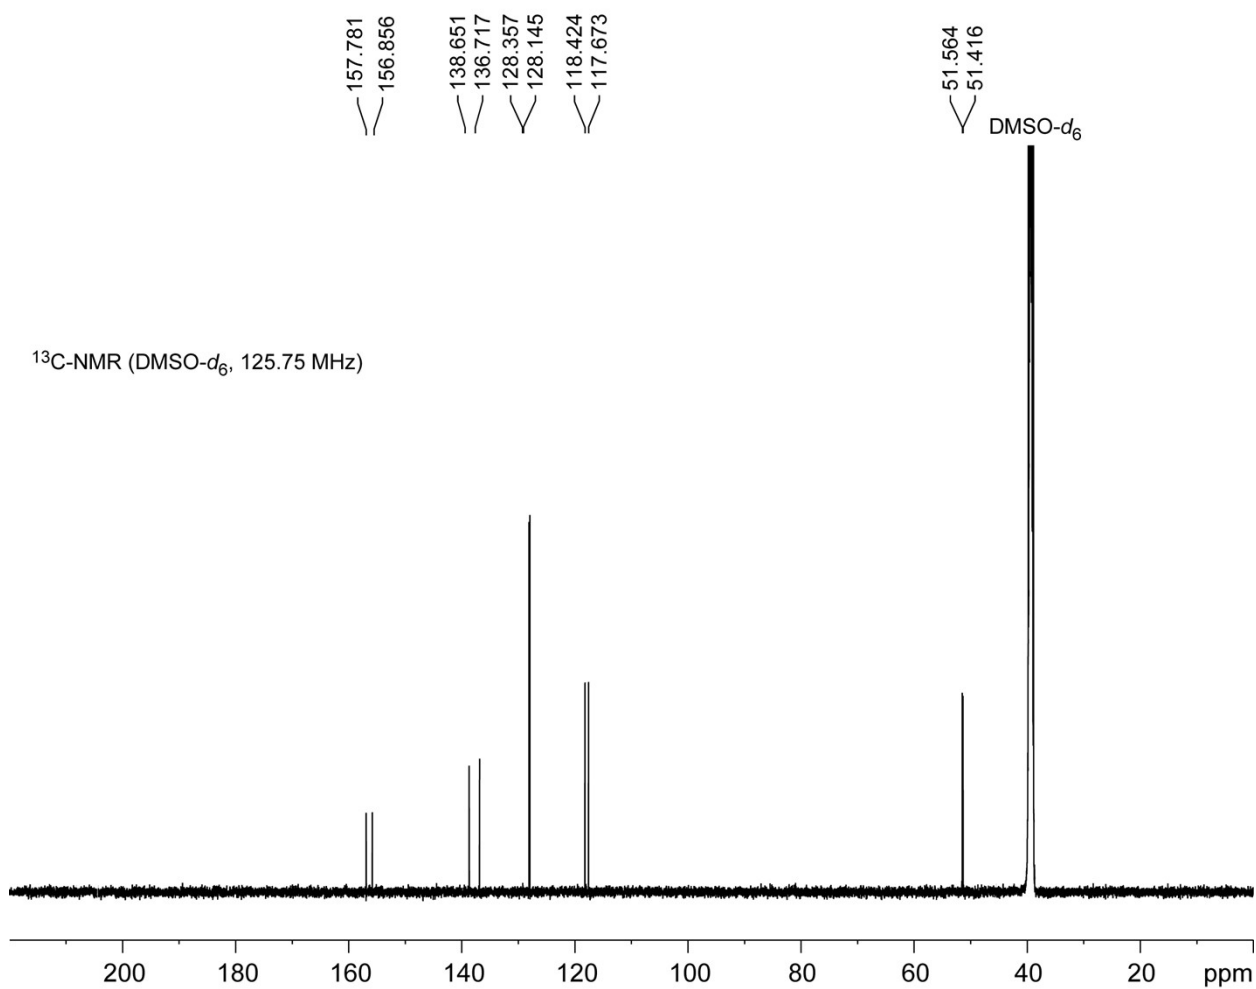

**Figure S9.**  $^{13}\text{C}$  NMR of **11** in DMSO- $d_6$  at 125.75 MHz.

**Table S1:** The Cartesian coordinates in (Angstroms) of **8** geometry

|    |              |              |              |
|----|--------------|--------------|--------------|
| Se | 10.201300000 | 11.267500000 | 2.132400000  |
| Se | 13.262400000 | 8.992700000  | 3.036300000  |
| C  | 8.138300000  | 8.694900000  | 1.705500000  |
| H  | 8.788900000  | 9.070400000  | 1.061700000  |
| H  | 7.234100000  | 8.995300000  | 1.436200000  |
| C  | 10.562100000 | 10.870800000 | 5.413400000  |
| H  | 10.346400000 | 11.837200000 | 5.403600000  |
| H  | 11.421600000 | 10.748500000 | 4.937900000  |
| C  | 12.654500000 | 8.814700000  | 6.285600000  |
| H  | 13.161700000 | 9.502600000  | 5.785800000  |
| H  | 13.303800000 | 8.257900000  | 6.785400000  |
| C  | 10.723900000 | 7.121100000  | 2.055600000  |
| H  | 11.433100000 | 6.594100000  | 1.611100000  |
| H  | 10.713200000 | 8.024500000  | 1.651000000  |
| N  | 8.437500000  | 9.207900000  | 3.056800000  |
| C  | 9.385400000  | 10.125700000 | 3.337300000  |
| N  | 9.504400000  | 10.136300000 | 4.688600000  |
| C  | 8.557400000  | 9.287400000  | 5.243400000  |
| H  | 8.403300000  | 9.144000000  | 6.170100000  |
| C  | 7.893600000  | 8.704500000  | 4.227900000  |
| H  | 7.190200000  | 8.071400000  | 4.298600000  |
| C  | 10.722900000 | 10.417200000 | 6.848600000  |
| C  | 11.710700000 | 9.489800000  | 7.262200000  |
| C  | 11.806900000 | 9.180300000  | 8.611400000  |
| H  | 12.486300000 | 8.580200000  | 8.896200000  |
| C  | 10.953400000 | 9.714500000  | 9.553300000  |
| H  | 11.049100000 | 9.486900000  | 10.470400000 |
| C  | 9.954400000  | 10.584600000 | 9.152000000  |
| H  | 9.334100000  | 10.932200000 | 9.780800000  |
| C  | 9.878100000  | 10.939700000 | 7.810900000  |
| H  | 9.216900000  | 11.566800000 | 7.543900000  |
| N  | 11.908300000 | 7.970000000  | 5.339700000  |
| C  | 12.021600000 | 8.056900000  | 3.996600000  |
| N  | 11.029100000 | 7.234500000  | 3.501100000  |
| C  | 10.401600000 | 6.615500000  | 4.553500000  |
| H  | 9.705300000  | 5.972800000  | 4.481100000  |
| C  | 10.929800000 | 7.063800000  | 5.695900000  |
| H  | 10.682300000 | 6.809400000  | 6.577400000  |
| C  | 9.384800000  | 6.453400000  | 1.826300000  |
| C  | 8.198400000  | 7.177200000  | 1.650200000  |
| C  | 7.014600000  | 6.474600000  | 1.410700000  |
| H  | 6.205600000  | 6.955900000  | 1.285300000  |
| C  | 6.994400000  | 5.107400000  | 1.355400000  |
| H  | 6.177500000  | 4.651100000  | 1.194600000  |
| C  | 8.171500000  | 4.383500000  | 1.533500000  |
| H  | 8.166400000  | 3.434000000  | 1.497800000  |
| C  | 9.346800000  | 5.076600000  | 1.760800000  |
| H  | 10.154300000 | 4.588400000  | 1.874500000  |

**Table S2:** The Cartesian coordinates in (Angstroms) of **9** geometry

|    |              |              |             |
|----|--------------|--------------|-------------|
| Se | 1.774200000  | 9.565000000  | 1.647200000 |
| C  | 3.060700000  | 8.787200000  | 2.710800000 |
| N  | 2.918300000  | 7.686000000  | 3.490800000 |
| C  | 1.733500000  | 6.842800000  | 3.535500000 |
| H  | 2.012400000  | 5.897200000  | 3.444900000 |
| H  | 1.157700000  | 7.061600000  | 2.760700000 |
| C  | 4.103300000  | 7.423700000  | 4.164900000 |
| H  | 4.259500000  | 6.712200000  | 4.774400000 |
| C  | 4.981200000  | 8.357200000  | 3.795300000 |
| H  | 5.879000000  | 8.433300000  | 4.095500000 |
| N  | 4.343500000  | 9.199800000  | 2.890000000 |
| C  | 4.966900000  | 10.334500000 | 2.225800000 |
| H  | 4.542700000  | 10.457500000 | 1.340000000 |
| H  | 5.923500000  | 10.128400000 | 2.074700000 |
| C  | 0.922900000  | 6.991500000  | 4.800900000 |
| C  | 0.904000000  | 8.197300000  | 5.508200000 |
| H  | 1.453000000  | 8.918100000  | 5.223000000 |
| C  | 0.089100000  | 8.353800000  | 6.626400000 |
| C  | -0.691900000 | 7.271000000  | 7.050800000 |
| H  | -1.238900000 | 7.357200000  | 7.822100000 |
| C  | -0.671300000 | 6.073300000  | 6.351200000 |
| H  | -1.208200000 | 5.345900000  | 6.641700000 |
| C  | 0.130900000  | 5.933600000  | 5.228200000 |
| H  | 0.138800000  | 5.112700000  | 4.750700000 |
| Se | 3.180400000  | 10.416300000 | 7.975900000 |
| C  | 1.893900000  | 11.194100000 | 6.912200000 |
| N  | 2.036300000  | 12.295300000 | 6.132300000 |
| C  | 3.221100000  | 13.138500000 | 6.087500000 |
| H  | 2.942200000  | 14.084100000 | 6.178100000 |
| H  | 3.796900000  | 12.919700000 | 6.862400000 |
| C  | 0.851300000  | 12.557600000 | 5.458200000 |
| H  | 0.695100000  | 13.269100000 | 4.848700000 |
| C  | -0.026600000 | 11.624100000 | 5.827700000 |
| H  | -0.924400000 | 11.548000000 | 5.527500000 |
| N  | 0.611100000  | 10.781500000 | 6.733100000 |
| C  | -0.012300000 | 9.646800000  | 7.397200000 |
| H  | 0.411900000  | 9.523800000  | 8.283100000 |
| H  | -0.968900000 | 9.852900000  | 7.548300000 |
| C  | 4.031700000  | 12.989800000 | 4.822100000 |
| C  | 4.050600000  | 11.784000000 | 4.114800000 |
| H  | 3.501600000  | 11.063200000 | 4.400100000 |
| C  | 4.865500000  | 11.627500000 | 2.996600000 |
| C  | 5.646500000  | 12.710300000 | 2.572200000 |
| H  | 6.193500000  | 12.624100000 | 1.800900000 |
| C  | 5.625900000  | 13.908000000 | 3.271800000 |
| H  | 6.162800000  | 14.635400000 | 2.981300000 |
| C  | 4.823700000  | 14.047700000 | 4.394800000 |
| H  | 4.815800000  | 14.868600000 | 4.872300000 |

**Table S3:** The Cartesian coordinates in (Angstroms) of **10** geometry

|    |              |              |             |
|----|--------------|--------------|-------------|
| Se | 8.181600000  | 5.865400000  | 1.021800000 |
| N  | 8.257600000  | 3.079000000  | 1.757300000 |
| C  | 7.496500000  | 4.208000000  | 1.515600000 |
| N  | 6.215100000  | 3.888600000  | 1.769400000 |
| C  | 6.135600000  | 2.551300000  | 2.121600000 |
| H  | 5.340900000  | 2.068100000  | 2.314700000 |
| C  | 7.383400000  | 2.062200000  | 2.138800000 |
| H  | 7.629600000  | 1.174300000  | 2.370300000 |
| C  | 9.709600000  | 2.995400000  | 1.816000000 |
| H  | 10.097300000 | 3.905000000  | 1.758900000 |
| H  | 10.043300000 | 2.470400000  | 1.045200000 |
| C  | 10.144400000 | 2.337900000  | 3.103800000 |
| C  | 10.766100000 | 1.081600000  | 3.098600000 |
| C  | 11.068200000 | 0.359300000  | 1.812600000 |
| H  | 11.708800000 | 0.881900000  | 1.286700000 |
| H  | 10.240700000 | 0.245000000  | 1.299700000 |
| H  | 11.451200000 | -0.520100000 | 2.014100000 |
| C  | 5.072200000  | 4.804400000  | 1.809100000 |
| H  | 4.478700000  | 4.629900000  | 1.035300000 |
| H  | 5.391400000  | 5.739200000  | 1.748000000 |
| C  | 4.297200000  | 4.611000000  | 3.100300000 |
| C  | 3.102400000  | 3.886100000  | 3.103800000 |
| H  | 6.361700000  | 6.140500000  | 5.239500000 |
| H  | 6.833600000  | 5.519400000  | 3.842100000 |
| H  | 5.865500000  | 6.793500000  | 3.865300000 |
| C  | 2.432300000  | 3.388400000  | 1.821200000 |
| H  | 2.276400000  | 4.146700000  | 1.218800000 |
| H  | 1.576100000  | 2.966200000  | 2.041500000 |
| H  | 3.014600000  | 2.735900000  | 1.379200000 |
| Se | 8.181600000  | 5.865400000  | 7.609500000 |
| N  | 8.257600000  | 3.079000000  | 6.873900000 |
| C  | 7.496500000  | 4.208000000  | 7.115600000 |
| N  | 6.215100000  | 3.888600000  | 6.861800000 |
| C  | 6.135600000  | 2.551300000  | 6.509700000 |
| H  | 5.340900000  | 2.068100000  | 6.316600000 |
| C  | 7.383400000  | 2.062200000  | 6.492400000 |
| H  | 7.629600000  | 1.174300000  | 6.261000000 |
| C  | 9.709600000  | 2.995400000  | 6.815200000 |
| H  | 10.097300000 | 3.905000000  | 6.872400000 |
| H  | 10.043300000 | 2.470400000  | 7.586000000 |
| C  | 9.843400000  | 2.964200000  | 4.315600000 |
| C  | 10.144400000 | 2.337900000  | 5.527500000 |
| C  | 10.766100000 | 1.081600000  | 5.532600000 |
| C  | 11.056700000 | 0.489000000  | 4.315600000 |
| H  | 11.474300000 | -0.364000000 | 4.315600000 |
| C  | 9.157200000  | 4.305300000  | 4.315600000 |
| H  | 9.019000000  | 4.601700000  | 5.239500000 |
| H  | 8.290200000  | 4.228800000  | 3.864500000 |
| H  | 9.714700000  | 4.957600000  | 3.842900000 |
| C  | 11.068200000 | 0.359300000  | 6.818700000 |

|   |              |              |             |
|---|--------------|--------------|-------------|
| H | 11.708800000 | 0.881900000  | 7.344500000 |
| H | 10.240700000 | 0.245000000  | 7.331500000 |
| H | 11.451200000 | -0.520100000 | 6.617200000 |
| C | 5.072200000  | 4.804400000  | 6.822100000 |
| H | 4.478700000  | 4.629900000  | 7.595900000 |
| H | 5.391400000  | 5.739200000  | 6.883300000 |
| C | 4.881900000  | 5.032700000  | 4.315600000 |
| C | 4.297200000  | 4.611000000  | 5.530900000 |
| C | 3.102400000  | 3.886100000  | 5.527500000 |
| C | 2.495700000  | 3.549300000  | 4.315600000 |
| H | 1.664600000  | 3.089700000  | 4.315600000 |
| C | 6.094000000  | 5.953400000  | 4.315600000 |
| C | 2.432300000  | 3.388400000  | 6.810100000 |
| H | 2.276400000  | 4.146700000  | 7.412500000 |
| H | 1.576100000  | 2.966200000  | 6.589700000 |
| H | 3.014600000  | 2.735900000  | 7.252000000 |

**Table S4:** The cartesian coordinates in (Angstroms) optimized geometry of **11** using BP86/def2-TZVP of **syn** conformers

|    |              |              |              |
|----|--------------|--------------|--------------|
| Se | -3.272923000 | -0.003275000 | -1.848414000 |
| C  | -3.205111000 | 0.000999000  | -0.013078000 |
| N  | -3.192341000 | -1.091099000 | 0.832825000  |
| C  | -3.161746000 | -0.674371000 | 2.156601000  |
| H  | -3.160507000 | -1.378570000 | 2.978487000  |
| C  | -3.161368000 | 0.683946000  | 2.154088000  |
| H  | -3.158946000 | 1.390989000  | 2.973527000  |
| N  | -3.191054000 | 1.096000000  | 0.829021000  |
| C  | -2.908820000 | -2.467204000 | 0.397451000  |
| H  | -3.396549000 | -3.145451000 | 1.111417000  |
| H  | -3.370399000 | -2.592862000 | -0.590868000 |
| C  | -1.410994000 | -2.682271000 | 0.347953000  |
| C  | -0.699814000 | -2.458519000 | -0.838075000 |
| H  | -1.246347000 | -2.228705000 | -1.752926000 |
| C  | -0.698541000 | -2.974364000 | 1.519849000  |
| H  | -1.238429000 | -3.182843000 | 2.446257000  |
| C  | -2.906773000 | 2.470169000  | 0.388925000  |
| H  | -3.367370000 | 2.592569000  | -0.600092000 |
| H  | -3.394774000 | 3.151178000  | 1.099889000  |
| C  | -1.408843000 | 2.685258000  | 0.340285000  |
| C  | -0.696270000 | 2.452518000  | -0.843167000 |
| H  | -1.241857000 | 2.214594000  | -1.756379000 |
| C  | -0.697494000 | 2.983692000  | 1.510997000  |
| H  | -1.238053000 | 3.197757000  | 2.436071000  |
| Se | 3.279692000  | -0.002787000 | -1.845066000 |
| C  | 3.205928000  | -0.000293000 | -0.009965000 |
| N  | 3.188875000  | -1.093437000 | 0.834548000  |

|   |             |              |              |
|---|-------------|--------------|--------------|
| C | 3.152379000 | -0.678328000 | 2.158680000  |
| H | 3.147107000 | -1.383528000 | 2.979675000  |
| C | 3.152572000 | 0.679935000  | 2.157871000  |
| H | 3.146156000 | 1.385917000  | 2.978186000  |
| N | 3.189236000 | 1.093686000  | 0.833465000  |
| C | 2.905446000 | -2.468695000 | 0.396459000  |
| H | 3.393569000 | -3.148582000 | 1.108623000  |
| H | 3.366592000 | -2.591903000 | -0.592364000 |
| C | 1.407579000 | -2.683396000 | 0.347218000  |
| C | 0.696019000 | -2.458650000 | -0.838366000 |
| H | 1.242219000 | -2.228632000 | -1.753405000 |
| C | 0.695441000 | -2.975279000 | 1.519379000  |
| H | 1.235631000 | -3.184716000 | 2.445387000  |
| C | 2.907668000 | 2.468713000  | 0.394149000  |
| H | 3.370577000 | 2.591404000  | -0.593749000 |
| H | 3.394979000 | 3.148412000  | 1.106838000  |
| C | 1.410063000 | 2.685418000  | 0.342628000  |
| C | 0.699482000 | 2.452276000  | -0.841944000 |
| H | 1.246600000 | 2.213551000  | -1.754041000 |
| C | 0.696695000 | 2.983758000  | 1.512159000  |
| H | 1.235682000 | 3.197623000  | 2.438199000  |

**Table S5:** The optimized geometry of **11** using BP86/def2-TZVP of **anti** conformers

|    |              |              |              |
|----|--------------|--------------|--------------|
| Se | 2.949967500  | 3.028510200  | -0.340492700 |
| C  | 1.154172200  | 3.390503100  | -0.172808200 |
| N  | 0.229687600  | 3.560399100  | -1.183406100 |
| C  | -1.020842100 | 3.840216900  | -0.649739700 |
| H  | -1.886499000 | 4.008811300  | -1.276477300 |
| C  | -0.890052600 | 3.856813200  | 0.701514000  |
| H  | -1.619607600 | 4.045521300  | 1.478293400  |
| N  | 0.440404000  | 3.586715200  | 0.992220700  |
| C  | 0.452269700  | 3.162674800  | -2.581967500 |
| H  | -0.188906300 | 3.796121400  | -3.210437300 |
| H  | 1.504285300  | 3.374293700  | -2.812973700 |
| C  | 0.124316100  | 1.693509000  | -2.743939000 |
| C  | 1.123731100  | 0.724099000  | -2.577920000 |
| H  | 2.157538900  | 1.040656900  | -2.439625100 |
| C  | -1.202925800 | 1.276500900  | -2.904426100 |
| H  | -1.992626000 | 2.018914600  | -3.040646800 |
| C  | 0.926702400  | 3.212675100  | 2.329131800  |
| H  | 2.003727800  | 3.424702400  | 2.351108800  |
| H  | 0.417411800  | 3.858760500  | 3.057652600  |
| C  | 0.635831700  | 1.747442000  | 2.575479800  |
| C  | 1.596091300  | 0.772352400  | 2.270127700  |
| H  | 2.592413500  | 1.083550200  | 1.955758400  |
| C  | -0.645673400 | 1.337341700  | 2.963476300  |
| H  | -1.402992900 | 2.084231100  | 3.211365400  |
| Se | -2.744524000 | -1.623054200 | 0.241722600  |
| C  | -1.139721000 | -2.496919900 | 0.098905600  |

|   |              |              |              |
|---|--------------|--------------|--------------|
| N | -0.511033700 | -2.921019400 | -1.055182400 |
| C | 0.683122800  | -3.558170400 | -0.748804000 |
| H | 1.320587800  | -3.980542600 | -1.514938600 |
| C | 0.814630600  | -3.541724700 | 0.604814500  |
| H | 1.588216200  | -3.948216400 | 1.243861000  |
| N | -0.299834900 | -2.894791900 | 1.120163600  |
| C | -0.916442900 | -2.492523500 | -2.396645900 |
| H | -2.002330300 | -2.635203800 | -2.481871500 |
| H | -0.414564100 | -3.158876600 | -3.112562300 |
| C | -0.548129800 | -1.039319900 | -2.623570100 |
| C | 0.786444100  | -0.626993900 | -2.522009300 |
| H | 1.571646100  | -1.366086400 | -2.349329700 |
| C | -1.539737500 | -0.076004400 | -2.834998000 |
| H | -2.583934000 | -0.384154200 | -2.894297900 |
| C | -0.443364300 | -2.442036400 | 2.506412900  |
| H | 0.187198500  | -3.096336200 | 3.124993500  |
| H | -1.492889100 | -2.582528600 | 2.798838200  |
| C | -0.042014500 | -0.985777300 | 2.634377900  |
| C | 1.256931200  | -0.579545500 | 2.304264200  |
| H | 2.004558200  | -1.324798100 | 2.024240900  |
| C | -0.986763100 | -0.015186600 | 2.983611300  |
| H | -2.005577600 | -0.320204900 | 3.223734300  |

### The optimized geometry of **11**

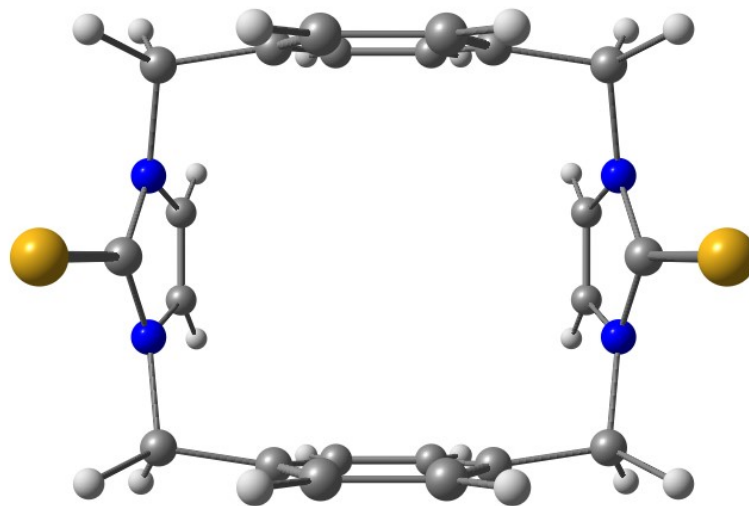

**Figure S10:** The optimized geometry of **11** using BP86/def2-TZVP of **syn** conformers



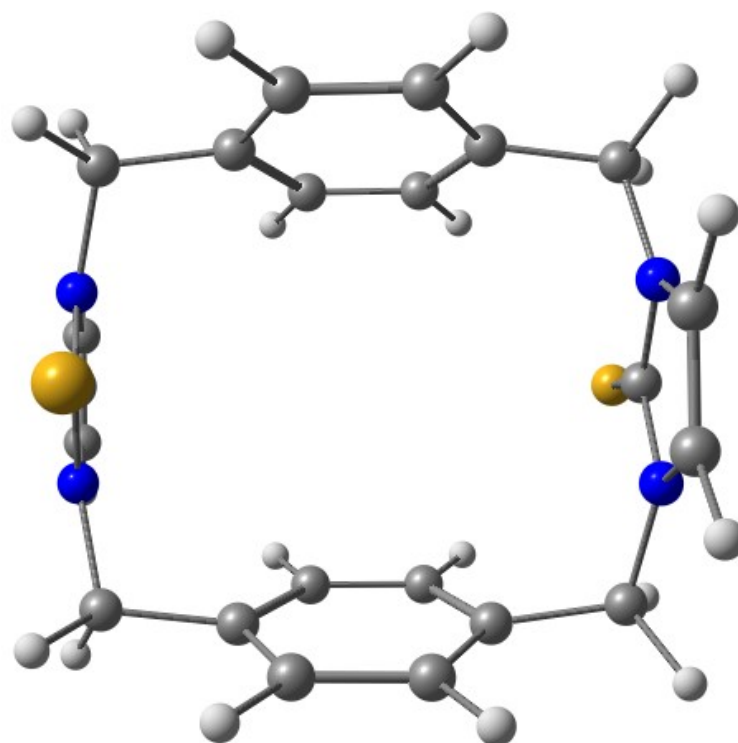

**Figure S11:** The optimized geometry of **11** using BP86/def2-TZVP of **anti** conformers
